# Supplementary material for: Improving mental health in black men through a 24-week community-based lifestyle change intervention: the black impact program
Source: Springer Nature journal article supplement (doi:10.1186/s12888-023-05064-5), 2024-01-09

Supplemental Figure 1. Study Consort Diagram

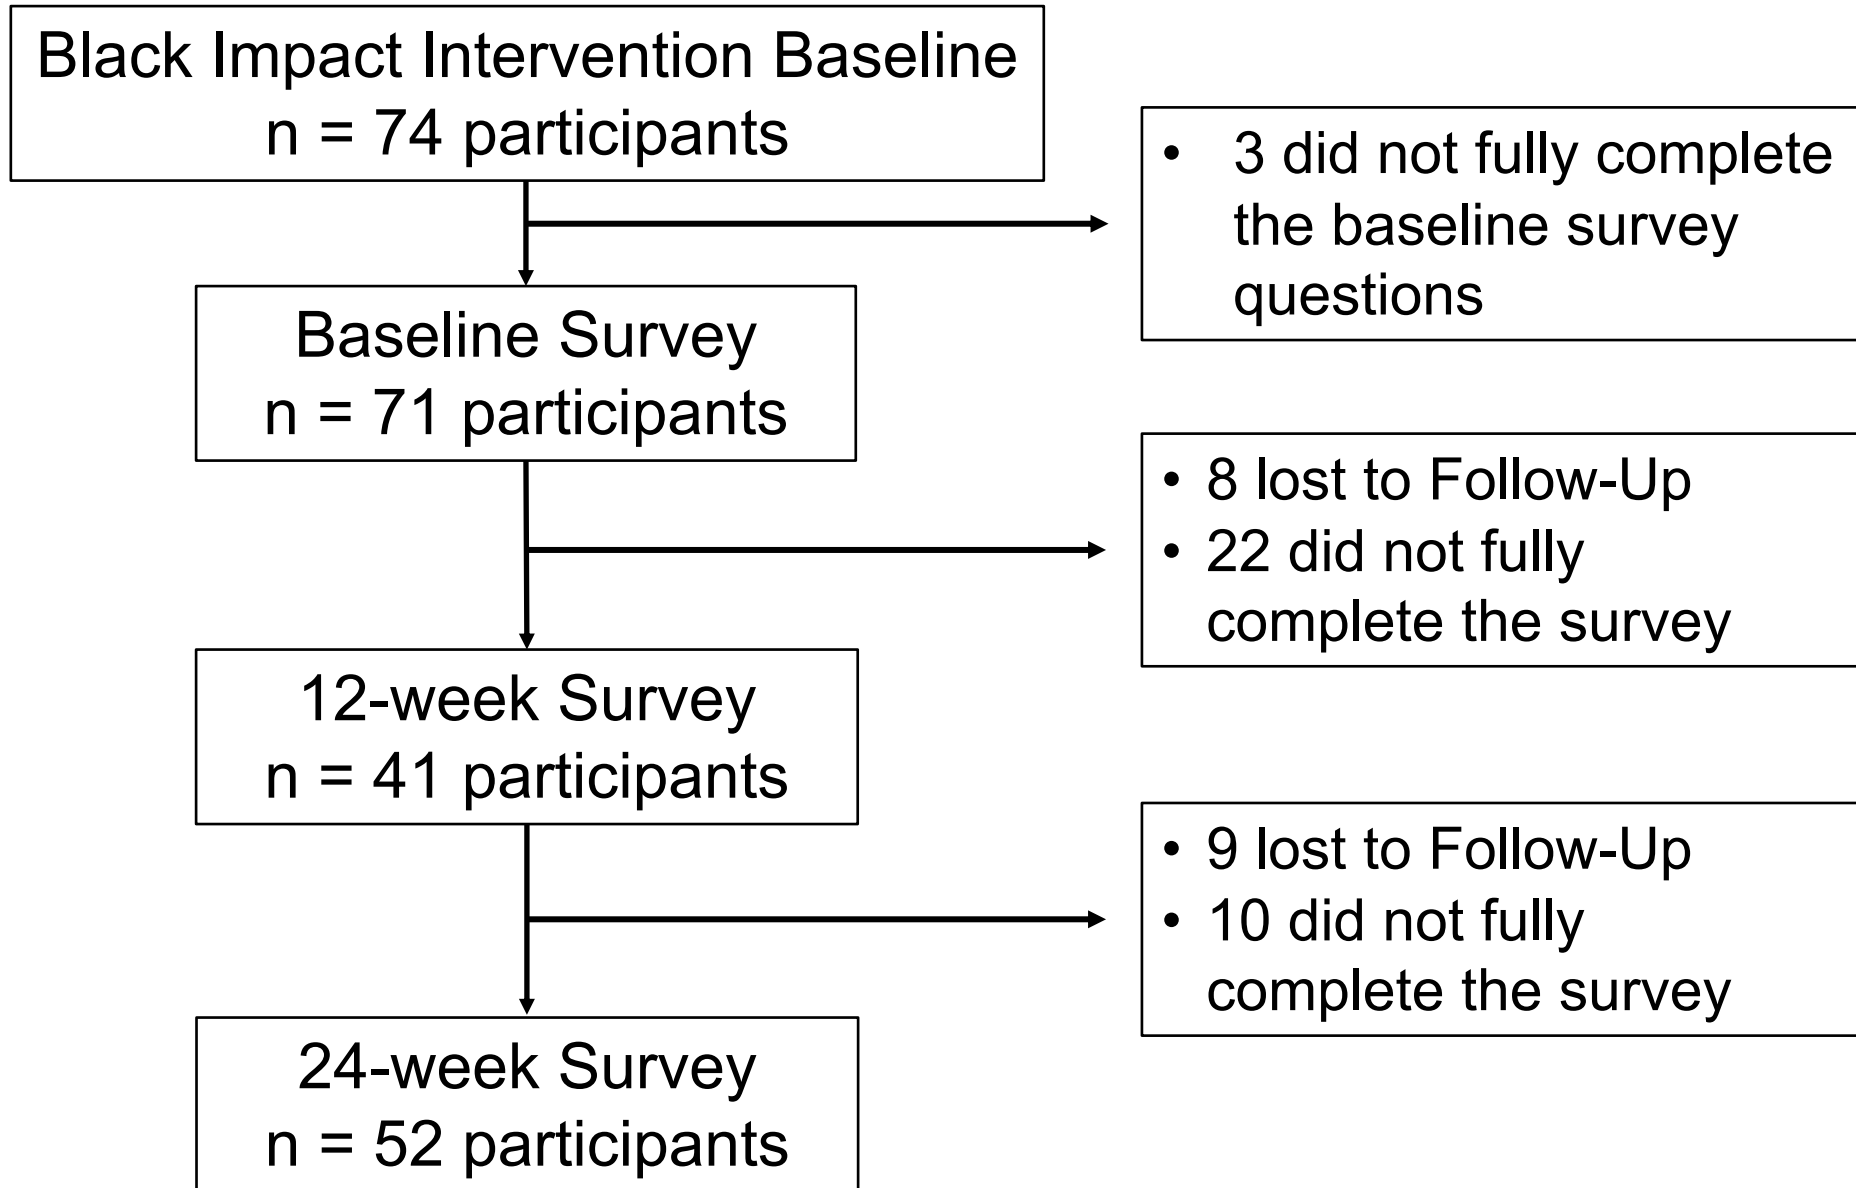

Supplement: MOESM2 [file 26610200]
